# Supplementary material
Source: HighWire-hosted journal article supplement (https://erj.ersjournals.com/content/55/3/1901518)
Supplement: inline-supplementary-material-1 [file inline-supplementary-material-1.pdf]

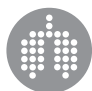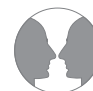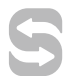

SHAREABLE PDF

# Exertional dyspnoea–ventilation relationship to discriminate respiratory from cardiac impairment

Franciele Plachi<sup>1,3</sup>, Fernanda Machado Balzan<sup>1,3</sup>, Luiz Felipe Fröhlich<sup>1</sup>, Ricardo Gass<sup>1</sup>, Nathalia Branco Mendes<sup>1</sup>, Elisa Schroeder<sup>1</sup>, Danilo C. Berton<sup>1</sup>, Denis E. O'Donnell<sup>2</sup> and J. Alberto Neder<sup>2</sup>

**Affiliations:** <sup>1</sup>Programa de Pós-Graduação em Ciências Pneumológicas, Universidade Federal do Rio Grande do Sul/Hospital de Clínicas de Porto Alegre, Porto Alegre, Brazil. <sup>2</sup>Laboratory of Clinical Exercise Physiology, Kingston Health Science Center and Queen's University, Kingston, ON, Canada. <sup>3</sup>These authors contributed equally to the study.

**Correspondence:** J. Alberto Neder, Laboratory of Clinical Exercise Physiology and Respiratory Investigation Unit, Queen's University and Kingston General Hospital, 102 Stuart Street, Kingston, ON, K7 L 2V6, Canada. E-mail: alberto.neder@queensu.ca

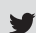

@ERSpublications

**An upward inflection in dyspnoea versus both  $V'_E$  and WR exposes lung mechanical abnormalities. Conversely, sharp increases in dyspnoea as a function of WR but not  $V'_E$  suggest that the underlying mechanism is proportional to inspiratory neural drive.** <http://bit.ly/2Ogapqr>

**Cite this article as:** Plachi F, Balzan FM, Fröhlich LF, *et al.* Exertional dyspnoea–ventilation relationship to discriminate respiratory from cardiac impairment. *Eur Respir J* 2020; 55: 1901518 [<https://doi.org/10.1183/13993003.01518-2019>].

This single-page version can be shared freely online.

*To the Editor:*

Activity-related dyspnoea is a key cause of physical impairment in cardiovascular and respiratory diseases [1]. Despite remarkable diagnostic advances in the past decades, discriminating “the heart” *versus* “the lungs” as a cause of exertional dyspnoea remains a challenge for cardiologists and pulmonologists.
